# Supplementary material for: Single-walled carbon nanotubes modulate pulmonary immune responses and increase pandemic influenza a virus titers in mice
Source: Springer Nature journal article supplement (doi:10.1186/s12985-017-0909-z), 2017-12-01
Supplement: MOESM1 [file 15329086]

# Supplemental table 1

Table A: All mouse weight during 7-day experiment in grams (Mean  $\pm$ SD)

| Treatment | Days             |                  |                  |                  |                    |                    |                             |                                      |
|-----------|------------------|------------------|------------------|------------------|--------------------|--------------------|-----------------------------|--------------------------------------|
|           | 0                | 1                | 2                | 3                | 4                  | 5                  | 6                           | 7                                    |
| Control   | 26.95 $\pm$ 2.07 | 25.27 $\pm$ 1.82 | 25.20 $\pm$ 1.65 | 25.59 $\pm$ 1.64 | 24.88 $\pm$ 1.49   | 25.03 $\pm$ 1.61   | 25.37 $\pm$ 1.52            | 25.79 $\pm$ 1.83                     |
| SWCNT     | 25.44 $\pm$ 1.85 | 24.05 $\pm$ 2.23 | 24.72 $\pm$ 1.88 | 24.31 $\pm$ 2.21 | 24.32 $\pm$ 1.87   | 24.46 $\pm$ 1.74   | 25.16 $\pm$ 1.75            | 25.02 $\pm$ 1.69                     |
| IAV       | 25.98 $\pm$ 1.93 | 24.88 $\pm$ 1.69 | 24.70 $\pm$ 1.89 | 24.90 $\pm$ 1.83 | 24.12 $\pm$ 1.56 * | 24.20 $\pm$ 1.30 * | 23.33 $\pm$ 1.87<br>*, #, a | 23.06 $\pm$ 1.67<br>*, #, a, b, c, d |
| SWCNT+IAV | 26.58 $\pm$ 1.30 | 25.23 $\pm$ 1.36 | 25.26 $\pm$ 1.33 | 25.70 $\pm$ 1.35 | 25.70 $\pm$ 1.48   | 25.63 $\pm$ 1.46   | 25.31 $\pm$ 1.86 \$         | 24.44 $\pm$ 2.07                     |

Table B: All mouse weight loss during 7-day experiment as % change from day 0 (Mean  $\pm$ SD)

| Treatment | Days            |                 |                 |                      |                   |                                     |                                            |
|-----------|-----------------|-----------------|-----------------|----------------------|-------------------|-------------------------------------|--------------------------------------------|
|           | 1               | 2               | 3               | 4                    | 5                 | 6                                   | 7                                          |
| Control   | 6.18 $\pm$ 1.75 | 6.38 $\pm$ 2.46 | 4.94 $\pm$ 2.13 | 7.53 $\pm$ 2.82      | 7.00 $\pm$ 2.58   | 5.71 $\pm$ 2.93                     | 4.23 $\pm$ 2.04                            |
| SWCNT     | 5.56 $\pm$ 3.46 | 2.83 $\pm$ 3.52 | 4.52 $\pm$ 3.32 | 4.39 $\pm$ 2.80*     | 3.12 $\pm$ 1.94 * | 1.06 $\pm$ 2.57 *, b                | 1.61 $\pm$ 2.73<br>b                       |
| IAV       | 4.15 $\pm$ 3.53 | 4.91 $\pm$ 2.59 | 4.11 $\pm$ 3.26 | 6.31 $\pm$ 3.45      | 5.90 $\pm$ 3.90 # | 9.46 $\pm$ 3.73 *, #, b, c, d, e, f | 10.41 $\pm$<br>4.14 *, #, b, c,<br>d, e, f |
| SWCNT+IAV | 5.04 $\pm$ 3.03 | 4.94 $\pm$ 2.72 | 3.31 $\pm$ 2.06 | 3.35 $\pm$ 1.90*, \$ | 3.60 $\pm$ 1.82 * | 4.87 $\pm$ 3.20 #, \$               | 8.17 $\pm$ 4.27<br>*, #, b, c, d, e, f     |

“\*” indicates statistically significant change from control group within each time point; “#” indicates statistically significant change from SWCNT group within each time point; “\$” indicates statistically significant change from IAV group within each time point. “a” indicates statistically significant change from day 0 group within each treatment group; “b” indicates statistically significant change from day 1 group within each treatment group; “c” indicates statistically significant change from day 2 group within each treatment group; “d” indicates statistically significant change from day 3 group within each treatment group; “e” indicates statistically significant change from day 4 group within each treatment group; “f” indicates statistically significant change from day 5 group within each treatment group. ( $P < 0.05$ )

## Supplement table 2

| Gene name                     | Forward primer (5'-3')         | Reverse primer (5'-3')        |
|-------------------------------|--------------------------------|-------------------------------|
| <i>gapdh</i>                  | AGG TCA TCC CAG AGC TGA ACG    | CAC CCT GTT GCT GTA GCC GTA T |
| <i>tlr3</i>                   | ACC TTT GTC TTC TGC ACG AAC CT | AGT TCT TCA CTT CGC AAC GCA   |
| <i>ifn<math>\beta</math>1</i> | GGCTTCCATCATGAACAACAGGT        | AGGTGAGGTTGATCTTTCCATTCAG     |
| <i>ifit2</i>                  | CGGAAAGCAGAGGAAATCAA           | TGAAAGTTGCCATACCGAAG          |
| <i>ifit3</i>                  | GACGATTAACGATGGAGTTC           | GGGCTCTCCTTACTGATGAC          |
| <i>rantes</i>                 | GCTGCTTTGCCTACCTCTCC           | TCGAGTGACAAACACGACTGC         |
| <i>il8</i>                    | CTTGAAGGTGTTGCCCTCAG           | TGGGGACACCTTTTAGCATC          |

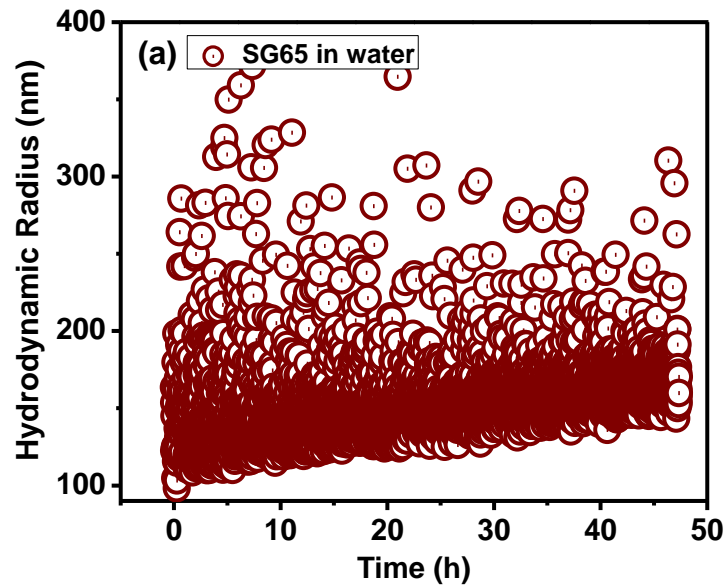

**Supplemental Figure 1.** Characterization of SWCNT. Hydrodynamic radii plot of SG65i dialyzed SWCNT used in all experiments. All experiments were performed at 37 °C.

A

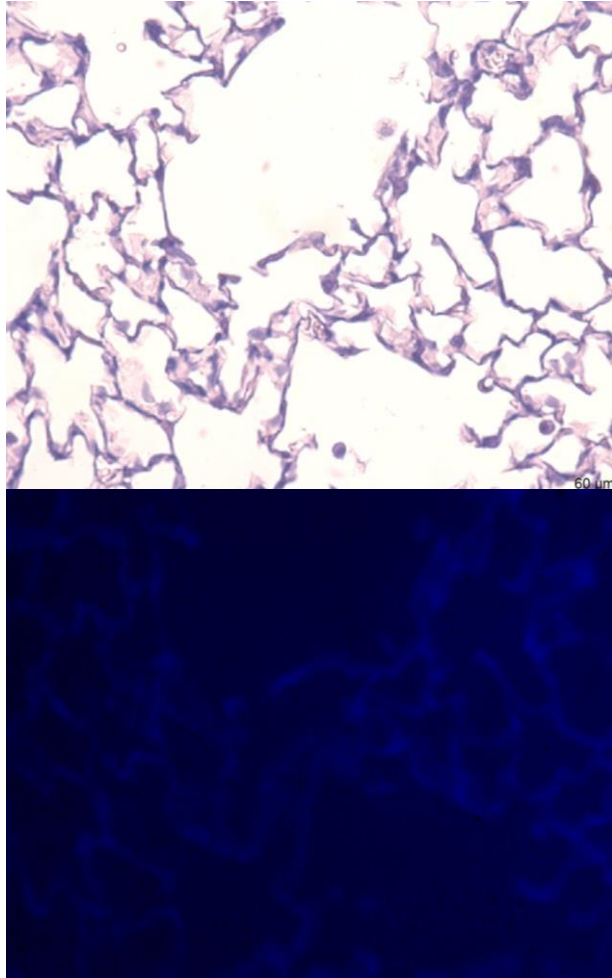

B

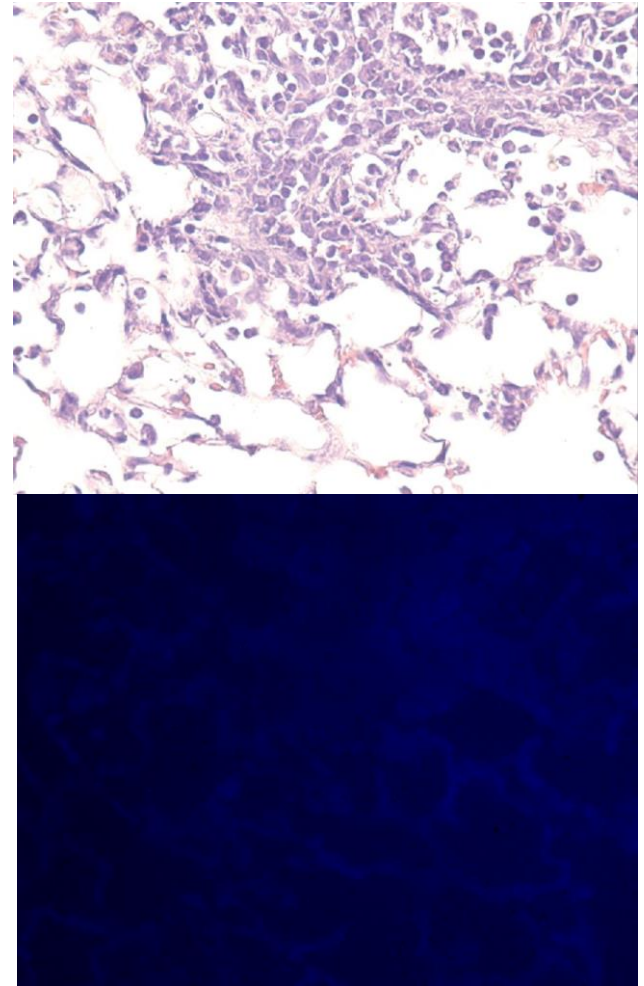

**Supplemental Figure 2.** NIRF of lung tissues among animals in control and IAV only group. Mouse lung H&E stained tissue sections from a (A) control and (B) IAV exposed animal and corresponding NIRF image, 400X.
